# Supplementary material for: Identification of distinct metabolic characteristics of pneumonia in type 2 diabetes mellitus
Source: PubMed Central journal article supplement (PMC7862164; doi:10.1002/ctm2.303), 2021-02-04
Supplement: CTM2-11-e303-s009.pdf [file CTM2-11-e303-s009.pdf]

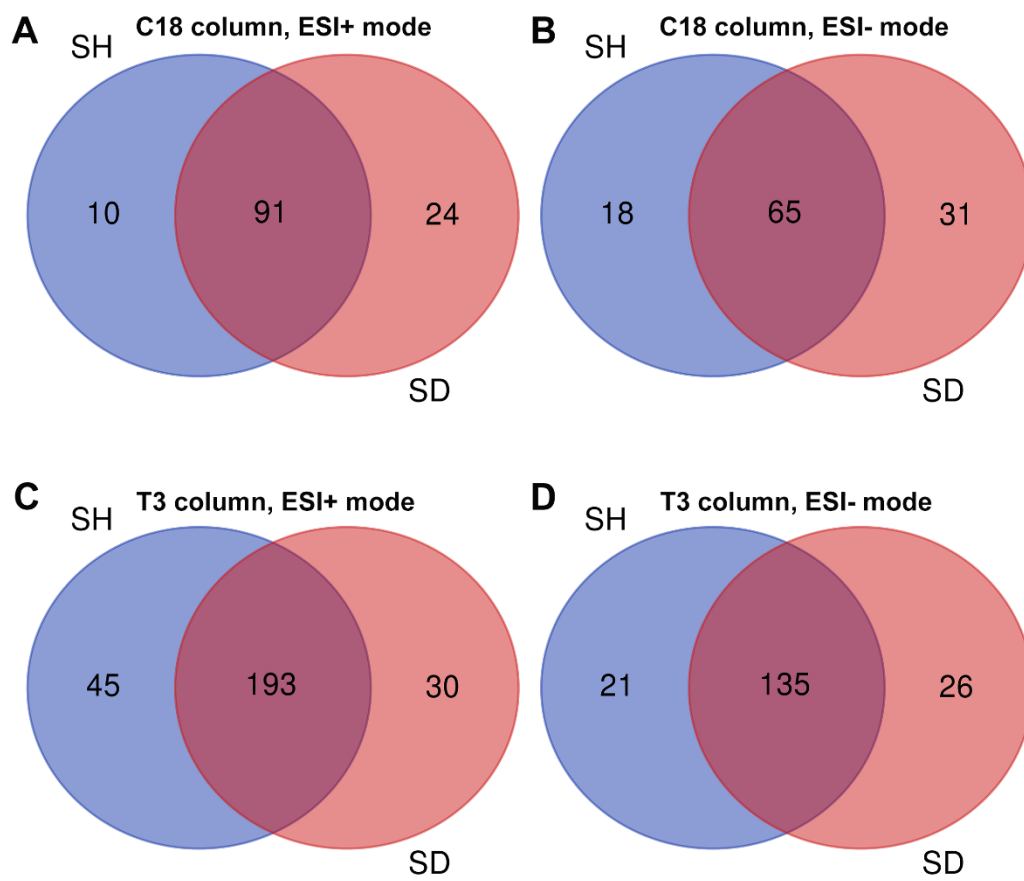

Supplementary Figure 1
