# Supplementary material for: Identification of distinct metabolic characteristics of pneumonia in type 2 diabetes mellitus
Source: Clin Transl Med. 2021 Feb 4;11(2):e303. doi: 10.1002/ctm2.303 (PMC7862164; doi:10.1002/ctm2.303)
Supplement: Supplementary file 11 — Supporting Information [file CTM2-11-e303-s013.pdf]

A Venn diagram with two overlapping circles. The left circle is green and contains the number 2508. The right circle is red and contains the number 363. The overlapping region in the center is shaded brown and contains the number 4070.

| Category             | Count |
|----------------------|-------|
| Left Set (Green)     | 2508  |
| Intersection (Brown) | 4070  |
| Right Set (Red)      | 363   |

- Pneumonia patients with T2DM vs. Healthy subjects
- Pneumonia patients with T2DM vs. T2DM patients

GLYCEROPHOSPHOLIPID METABOLISM

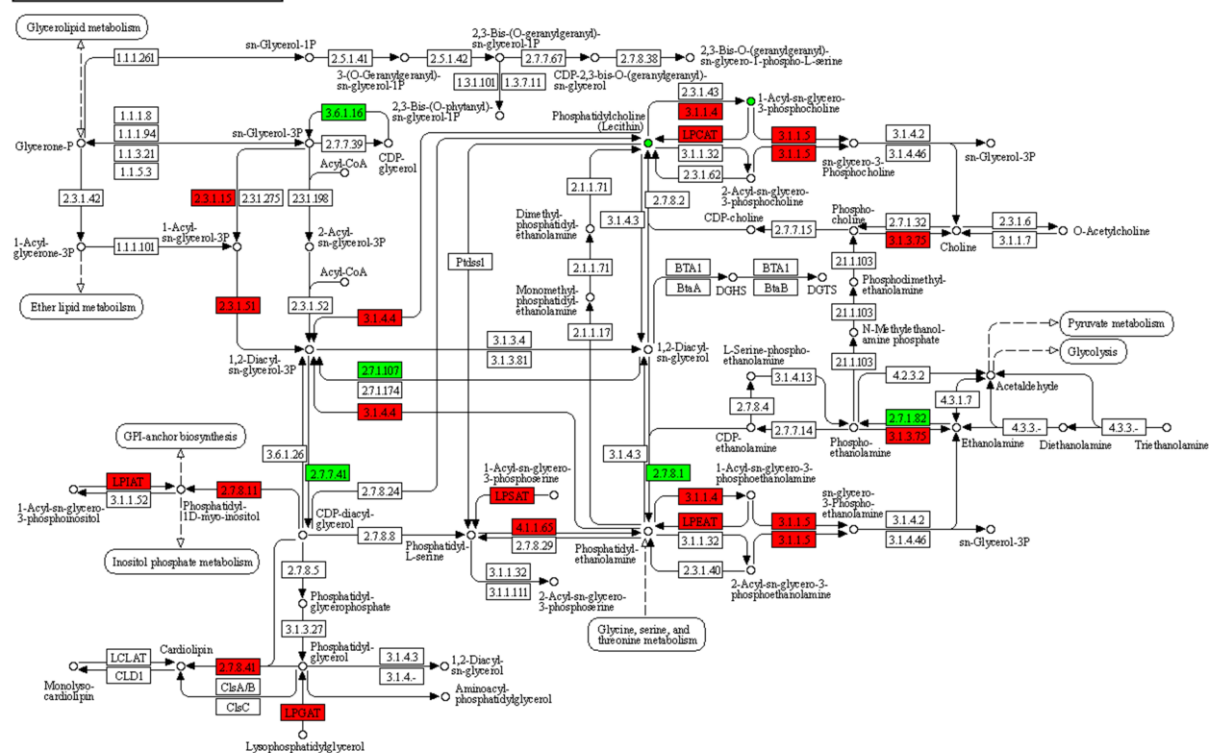

### Supplementary Figure 3
